# Supplementary material for: A Second Case of Human Conjunctival Infestation With Thelazia gulosa and a Review of T. gulosa in North America
Source: Oxford University Press journal article supplement (doi:10.1093/cid/ciz469), 2019-08-02
Supplement: ciz469_suppl_supplementary_table.docx [file ciz469_suppl_supplementary_table.docx]

| **Morphometric measurements of adult female *Thelazia* species infecting humans** | | | ***Thelazia callipaeda*** | ***Thelazia californiensis*** | ***Thelazia gulosa*** | **This  specimen** |
| --- | --- | --- | --- | --- | --- | --- |
| Body | | |  |  |  |  |
|  | Total length (mm) | | 11.5-18.5 | 12.8-18.8 | 8.0-15.0 | 11.0 |
|  | Maximum width (µm) | | 280-510 | 294-530 | 350-579 | 320 |
|  |  |  |  |  |  |  |
|  | Cuticular striations per mm | |  |  |  |  |
|  |  | At widest point (mid-body) | 125-300 | 30-111 | 55* | 45 |
|  |  |  |  |  |  |  |
| Buccal capsule (µm) | | |  |  |  |  |
|  | Width at anterior | | 43-50 | 33-51 | 33-56 | 35 |
|  | Depth | | 31-34 | 25-30 | 14-54 | 25 |
|  |  |  |  |  |  |  |
| Esophagus (µm) | | |  |  |  |  |
|  | Total length | | 620-650 | 450-604 | 255-411 | nd |
|  | Width at bulb | | 50-80 | 66-88 | 48-106 | 70 |
|  |  |  |  |  |  |  |
| Anatomical Landmarks (µm) | | |  |  |  |  |
|  | Uterine opening from anterior end | | 436-610 | 637-945 | 390-591 | 499 |
|  | Anus from posterior end | | 70-102 | 78-138 | 70-145 | 75 |
|  | Morphology of anal opening | | Protruding | Protruding | Not protruding | Not protruding |
|  | Vulval opening relative to esophago-intestinal junction | | Anterior | Posterior | In-line /slightly posterior | nd |

**Supplementary Table 1:** Collated reference [1,5-7] morphometric measurements and differentiating features of adult female *Thelazia* species reported infecting the human conjunctiva in comparison to this case.

**nd:** not determined. The length of esophagus in this specimen could not be accurately measured due to the anterior retraction of this organ in response to a break in the contiguous intestinal tract.

*Measurements for only one specimen in the scientific literature, range not available
